# Supplementary material for: Valorization of Spent Coffee Grounds as a Natural Source of Bioactive Compounds for Several Industrial Applications—A Volatilomic Approach
Source: MDPI journal article supplement (doi:10.3390/foods11121731), 2022-06-13
Supplement: s1 [file s1]

# Valorization of spent coffee grounds as a natural source of bioactive compounds for several industrial applications. A volatilomic approach

Carolina Andrade <sup>1</sup>, Rosa Perestrelo <sup>1,\*</sup> and José S. Câmara <sup>1,2</sup>

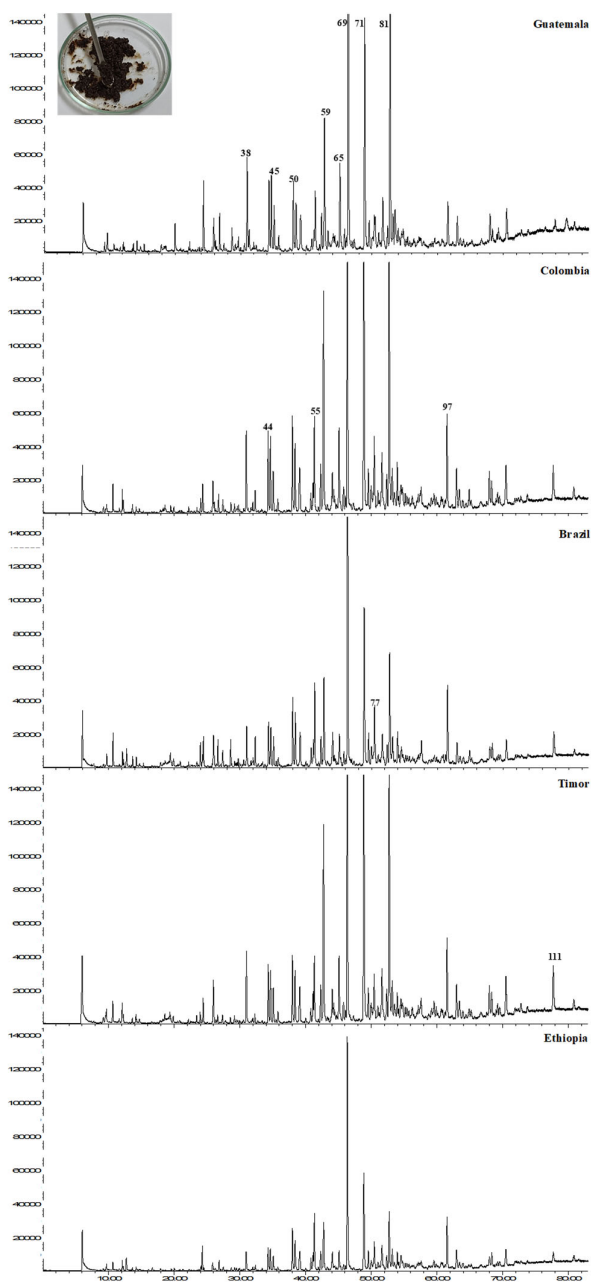

**Figure S1.** Chromatograms obtained through HS-SPME/GC-MS for spent coffee grounds from different geographical origin (attribution of the peak number is shown in Table 1).
